# Supplementary material
Source: PubMed Central journal article supplement (PMC6457907)
Supplement: NIHMS1516901-supplement-Sup_Tables_1-4.pdf [file NIHMS1516901-supplement-Sup_Tables_1-4.pdf]

**SUPPLEMENTARY TABLES**

| <b>Sample ID#</b> | <b>Sex (M, F)</b> | <b>Age at diagnosis (yr)</b> | <b>Glioma Subtype (original path)</b> | <b>Interval diagnosis to LP (days)</b> | <b># prior tumor resections</b> | <b>Prior RT (0=no, 1=yes)</b> | <b>Lines of Prior Systemic therapy</b> |
|-------------------|-------------------|------------------------------|---------------------------------------|----------------------------------------|---------------------------------|-------------------------------|----------------------------------------|
| Patient--01       | M                 | 36                           | OD, IDH-mutant and 1p/19q-codeleted   | 5745                                   | 3                               | 1                             | 5                                      |
| Patient--02       | M                 | 33                           | AO, IDH-mutant and 1p/19q-codeleted   | 3876                                   | 2                               | 1                             | 5                                      |
| Patient--03       | M                 | 31                           | AO, IDH-mutant and 1p/19q-codeleted   | 2038                                   | 3                               | 1                             | 3                                      |
| Patient--04       | M                 | 30                           | Astrocytoma, IDH-mutant               | 1911                                   | 2                               | 1                             | 2                                      |
| Patient--05       | M                 | 31                           | AA, IDH-mutant                        | 828                                    | 1                               | 1                             | 3                                      |
| Patient--06       | F                 | 38                           | AA, IDH-mutant                        | 172                                    | 2                               | 1                             | 0                                      |
| Patient--07       | F                 | 28                           | AA, IDH-mutant                        | 2167                                   | 4                               | 1                             | 5                                      |
| Patient--08       | M                 | 26                           | Astrocytoma, IDH-wildtype             | 1749                                   | 4                               | 1                             | 5                                      |
| Patient--09       | M                 | 51                           | AA, IDH-wildtype                      | 273                                    | 2                               | 1                             | 2                                      |
| Patient--10       | M                 | 40                           | AA, IDH-wildtype                      | 350                                    | 1                               | 1                             | 1                                      |
| Patient--11       | M                 | 29                           | GBM, IDH-mutant                       | 176                                    | 1                               | 1                             | 1                                      |
| Patient--12       | M                 | 22                           | GBM, IDH-wildtype                     | 389                                    | 2                               | 1                             | 4                                      |
| Patient--13       | F                 | 26                           | GBM, IDH-wildtype                     | 392                                    | 1                               | 1                             | 1                                      |
| Patient--14       | M                 | 54                           | GBM, IDH-wildtype                     | 277                                    | 1                               | 1                             | 2                                      |
| Patient--15       | M                 | 59                           | GBM, IDH-wildtype                     | 82                                     | 1                               | 1                             | 0                                      |
| Patient--16       | M                 | 23                           | GBM, IDH-wildtype                     | 334                                    | 1                               | 1                             | 2                                      |
| Patient--17       | M                 | 66                           | GBM, IDH-wildtype                     | 272                                    | 2                               | 1                             | 2                                      |
| Patient--18       | M                 | 33                           | GBM, IDH-wildtype                     | 1014                                   | 3                               | 1                             | 3                                      |
| Patient--19       | F                 | 72                           | GBM, IDH-wildtype                     | 189                                    | 1                               | 1                             | 2                                      |
| Patient--20       | M                 | 47                           | GBM, IDH-wildtype                     | 373                                    | 2                               | 1                             | 3                                      |
| Patient--21       | M                 | 42                           | GBM, IDH-wildtype                     | 466                                    | 2                               | 1                             | 3                                      |
| Patient--22       | M                 | 75                           | GBM, IDH-wildtype                     | 336                                    | 1                               | 1                             | 1                                      |

|             |   |    |                                     |      |   |   |   |
|-------------|---|----|-------------------------------------|------|---|---|---|
| Patient--23 | M | 27 | GBM, IDH-wildtype                   | 611  | 1 | 1 | 2 |
| Patient--24 | F | 60 | GBM, IDH-wildtype                   | 502  | 2 | 1 | 3 |
| Patient--25 | M | 54 | GBM, IDH-wildtype                   | 528  | 1 | 1 | 2 |
| Patient--26 | M | 69 | GBM, IDH-wildtype                   | 528  | 2 | 1 | 2 |
| Patient--27 | M | 41 | GBM, IDH-wildtype                   | 460  | 1 | 1 | 3 |
| Patient--28 | M | 50 | GBM, IDH-wildtype                   | 1279 | 4 | 1 | 5 |
| Patient--29 | F | 77 | GBM, IDH-wildtype                   | 62   | 1 | 1 | 1 |
| Patient--30 | M | 49 | GBM, IDH-wildtype                   | 1025 | 1 | 1 | 1 |
| Patient--31 | F | 43 | OD, IDH-mutant and 1p/19q-codeleted | 4776 | 5 | 1 | 2 |
| Patient--32 | M | 47 | OD, IDH-mutant and 1p/19q-codeleted | 4803 | 2 | 1 | 2 |
| Patient--33 | M | 38 | AA, IDH-mutant                      | 1395 | 2 | 1 | 2 |
| Patient--34 | F | 31 | AA, IDH-mutant                      | 1685 | 3 | 1 | 3 |
| Patient--35 | F | 61 | GBM, IDH-wildtype                   | 671  | 2 | 1 | 3 |
| Patient--36 | M | 56 | GBM, IDH-wildtype                   | 834  | 2 | 1 | 4 |
| Patient--37 | F | 53 | GBM, IDH-wildtype                   | 263  | 1 | 1 | 1 |
| Patient--38 | F | 64 | GBM, IDH-wildtype                   | 163  | 1 | 1 | 1 |
| Patient--39 | M | 68 | GBM, IDH-wildtype                   | 77   | 1 | 1 | 1 |
| Patient--40 | M | 65 | GBM, IDH-wildtype                   | 146  | 1 | 1 | 1 |
| Patient--41 | F | 34 | AA, IDH-wildtype (Spinal cord)      | 234  | 1 | 1 | 2 |
| Patient--42 | M | 59 | GBM, IDH-wildtype                   | 101  | 1 | 1 | 1 |
| Patient--43 | M | 56 | OD, IDH-mutant and 1p/19q-codeleted | 3296 | 2 | 1 | 1 |
| Patient--44 | F | 64 | GBM, IDH-wildtype                   | 801  | 2 | 1 | 3 |
| Patient--45 | M | 42 | GBM, IDH-wildtype                   | 485  | 1 | 1 | 4 |
| Patient--46 | F | 67 | GBM, IDH-wildtype                   | 487  | 1 | 1 | 1 |
| Patient--47 | F | 27 | Astrocytoma, IDH-mutant             | 2969 | 2 | 1 | 3 |
| Patient--48 | M | 57 | GBM, IDH-wildtype                   | 279  | 1 | 1 | 1 |

|             |   |    |                                     |      |   |   |   |
|-------------|---|----|-------------------------------------|------|---|---|---|
| Patient--49 | M | 41 | AA, IDH-wildtype                    | 379  | 1 | 1 | 1 |
| Patient--50 | M | 32 | OD, IDH-mutant and 1p/19q-codeleted | 7351 | 2 | 1 | 2 |
| Patient--51 | F | 53 | AA, IDH-mutant                      | 548  | 2 | 1 | 3 |
| Patient--52 | F | 45 | GBM, IDH-wildtype                   | 296  | 1 | 1 | 2 |
| Patient--53 | M | 31 | Astrocytoma, IDH-mutant             | 2195 | 3 | 0 | 2 |
| Patient--54 | F | 68 | GBM, IDH-mutant                     | 621  | 1 | 1 | 1 |
| Patient--55 | M | 78 | GBM, IDH-wildtype                   | 102  | 1 | 1 | 1 |
| Patient--56 | F | 55 | Astrocytoma, NOS                    | 3738 | 1 | 1 | 1 |
| Patient--57 | M | 71 | GBM, IDH-wildtype                   | 1606 | 2 | 1 | 2 |
| Patient--58 | M | 65 | GBM, IDH-wildtype                   | 165  | 1 | 1 | 1 |
| Patient--59 | F | 38 | OD, NOS                             | 3032 | 2 | 1 | 4 |
| Patient--60 | F | 45 | AO, IDH-mutant and 1p/19q-codeleted | 1710 | 1 | 1 | 3 |
| Patient--61 | M | 62 | GBM, IDH-wildtype                   | 1020 | 2 | 1 | 5 |
| Patient--62 | F | 39 | OD, NOS                             | 9122 | 2 | 1 | 1 |
| Patient--63 | F | 44 | GBM, IDH-wildtype                   | 263  | 1 | 1 | 2 |
| Patient--64 | M | 51 | AA, IDH-wildtype                    | 1076 | 1 | 1 | 2 |
| Patient--65 | F | 57 | AA, IDH-wildtype                    | 824  | 2 | 1 | 3 |
| Patient--66 | F | 57 | AA, IDH-wildtype                    | 436  | 2 | 1 | 3 |
| Patient--67 | M | 64 | GBM, IDH-wildtype                   | 914  | 1 | 1 | 5 |
| Patient--68 | M | 59 | GBM, IDH-wildtype                   | 383  | 2 | 1 | 3 |
| Patient--69 | M | 54 | GBM, IDH-wildtype                   | 209  | 1 | 1 | 0 |
| Patient--70 | M | 90 | GBM, IDH-wildtype                   | 296  | 1 | 1 | 2 |
| Patient--71 | F | 72 | AA, IDH-wildtype                    | 2982 | 3 | 1 | 4 |
| Patient--72 | F | 44 | AA, IDH-mutant                      | 1052 | 1 | 1 | 2 |
| Patient--73 | M | 69 | GBM, IDH-wildtype                   | 112  | 1 | 1 | 1 |
| Patient--74 | F | 22 | AA, IDH-wildtype                    | 79   | 1 | 1 | 1 |

|             |   |    |                                     |      |   |   |   |
|-------------|---|----|-------------------------------------|------|---|---|---|
| Patient--75 | M | 47 | GBM, IDH-wildtype                   | 204  | 3 | 1 | 1 |
| Patient--76 | M | 35 | AA, IDH-mutant                      | 1088 | 1 | 1 | 1 |
| Patient--77 | F | 44 | GBM, IDH-wildtype                   | 123  | 1 | 1 | 2 |
| Patient--78 | F | 43 | AA, IDH-mutant                      | 401  | 1 | 1 | 1 |
| Patient--79 | F | 79 | AA, IDH-wildtype                    | 591  | 3 | 1 | 2 |
| Patient--80 | M | 39 | GBM, IDH-wildtype                   | 410  | 1 | 1 | 3 |
| Patient--81 | M | 74 | AA, IDH-wildtype                    | 510  | 1 | 1 | 1 |
| Patient--82 | M | 35 | AA, IDH-mutant                      | 63   | 1 | 1 | 1 |
| Patient--83 | M | 44 | AO, IDH-mutant and 1p/19q-codeleted | 7669 | 4 | 1 | 3 |
| Patient--84 | M | 26 | AA, IDH-mutant                      | 2116 | 1 | 1 | 0 |
| Patient--85 | M | 29 | OD, IDH-mutant and 1p/19q-codeleted | 4406 | 5 | 1 | 1 |

**Supplementary Information Table 1.** Demographic data for all patients included in our glioma cohort (N=85). OD=oligodendroglioma; AO=anaplastic oligodendroglioma; AA=anaplastic astrocytoma; GBM=glioblastoma

| Sample ID# | Vital Status (0=alive, 1=dead) | Survival from CSF collection to Death/LFU | Tumor volume (initial Preop) (cm3) | Tumor volume (initial Postop) (cm3) | % extent of resection | Tumor burden @ LP (mm2) | IDH status | CSF ctDNA status |
|------------|--------------------------------|-------------------------------------------|------------------------------------|-------------------------------------|-----------------------|-------------------------|------------|------------------|
| 02         | 0                              | 774                                       | 28.6                               | 0                                   | 100%                  | 1371.6                  | mutant     | positive         |
| 03         | 1                              | 812                                       | 113                                | 21.9                                | 81%                   | 0.0                     | mutant     | positive         |
| 05         | 1                              | 192                                       | 73.5                               | 58.3                                | 21%                   | 10322.6                 | mutant     | positive         |
| 06         | 0                              | 781                                       | 11.5                               | 1.5                                 | 87%                   | 730.8                   | mutant     | positive         |
| 07         | 1                              | 141                                       | 90.9                               | 0                                   | 100%                  | 1728.5                  | mutant     | positive         |
| 10         | 1                              | 71                                        | 1.4                                | 0                                   | 100%                  | 404.2                   | WT         | positive         |
| 11         | 1                              | 945                                       | 30.7                               | 3.8                                 | 88%                   | 676.9                   | mutant     | positive         |
| 12         | 1                              | 56                                        | 25.7                               | 10.5                                | 59%                   | 870.0                   | WT         | positive         |
| 15         | 1                              | 255                                       | 68                                 | 67.3                                | 1%                    | 3648.9                  | WT         | positive         |
| 16         | 1                              | 64                                        | 7.4                                | 1.3                                 | 82%                   | 498.5                   | WT         | positive         |
| 17         | 1                              | 47                                        | 69.4                               | 3.1                                 | 96%                   | 4031.8                  | WT         | positive         |
| 18         | 1                              | 311                                       | 3                                  | 0                                   | 100%                  | 452.1                   | WT         | positive         |
| 19         | 1                              | 115                                       | 26.2                               | 17                                  | 35%                   | 1817.1                  | WT         | positive         |
| 20         | 1                              | 26                                        | 104                                | 9.1                                 | 91%                   | 1318.1                  | WT         | positive         |
| 21         | 1                              | 30                                        | 15.6                               | 0.4                                 | 97%                   | 8001.1                  | WT         | positive         |
| 22         | 1                              | 60                                        | 98.8                               | 19.3                                | 80%                   | 1928.08                 | WT         | positive         |
| 23         | 1                              | 555                                       | 53.3                               | 17.9                                | 66%                   | 822.3                   | WT         | positive         |
| 24         | 1                              | 17                                        | 19.7                               | 0                                   | 100%                  | 649.2                   | WT         | positive         |
| 25         | 1                              | 44                                        | 65                                 | 6.4                                 | 90%                   | 2511.0                  | WT         | positive         |
| 26         | 1                              | 80                                        | 44.8                               | 7.5                                 | 83%                   | 1238.3                  | WT         | positive         |
| 27         | 1                              | 115                                       | 3.1                                | 0                                   | 100%                  | 2527.8                  | WT         | positive         |
| 28         | 1                              | 102                                       | 7.3                                | 0                                   | 100%                  | 1582.7                  | WT         | positive         |
| 29         | 1                              | 150                                       | 79.3                               | 4.2                                 | 95%                   | 2306.4                  | WT         | positive         |
| 30         | 1                              | 119                                       | 0.9                                | 0                                   | 100%                  | 2831.8                  | WT         | positive         |

|    |   |      |      |      |      |        |        |          |
|----|---|------|------|------|------|--------|--------|----------|
| 33 | 1 | 96   | 59.7 | 0    | 100% | 932.5  | mutant | positive |
| 35 | 1 | 26   | 45.8 | 7.6  | 83%  | 2447   | WT     | positive |
| 36 | 1 | 22   | 89.4 | 3.5  | 96%  | 982.6  | WT     | positive |
| 37 | 1 | 14   | 0.5  | 0    | 100% | 104.9  | WT     | positive |
| 38 | 1 | 131  | 69.8 | 0.8  | 99%  | 369.9  | WT     | positive |
| 39 | 1 | 16   | 85.9 | 45.9 | 47%  | 6941.8 | WT     | positive |
| 40 | 1 | 21   | 84.4 | 14.8 | 82%  | 1825.2 | WT     | positive |
| 41 | 1 | 235  | 5    | 4.8  | 4%   | 0.0    | WT     | positive |
| 42 | 1 | 30   | 57.3 | 32.3 | 44%  | 2564.6 | WT     | positive |
| 43 | 0 | 1130 | 23.9 | 20   | 16%  | 0.0    | mutant | negative |
| 44 | 1 | 938  | 7.9  | 0    | 100% | 250.9  | WT     | negative |
| 45 | 1 | 377  | 20   | 0    | 100% | 284.0  | WT     | negative |
| 46 | 0 | 1265 | 104  | 0    | 100% | 992.6  | WT     | negative |
| 49 | 1 | 613  | 90.7 | 90.1 | 1%   | 4501.8 | WT     | negative |
| 52 | 1 | 169  | 25.7 | 25.4 | 1%   | 1339.9 | WT     | negative |
| 53 | 0 | 655  | 9.9  | 0    | 100% | 1256.6 | mutant | negative |
| 54 | 0 | 954  | 82.8 | 0    | 100% | 192.2  | mutant | negative |
| 55 | 1 | 65   | 67.1 | 12.7 | 81%  | 1566.7 | WT     | negative |
| 58 | 1 | 219  | 44.8 | 33.2 | 26%  | 588.1  | WT     | negative |
| 60 | 0 | 850  | 77.2 | 0    | 100% | 1019.5 | mutant | negative |
| 61 | 1 | 263  | 20.4 | 0    | 100% | 184.1  | WT     | negative |
| 63 | 1 | 51   | 20.3 | 0    | 100% | 341.4  | WT     | negative |
| 64 | 1 | 101  | 5.1  | 0    | 100% | 1128.1 | WT     | negative |
| 65 | 1 | 194  | 36.9 | 36.5 | 1%   | 1888.1 | WT     | negative |
| 66 | 1 | 216  | 24.5 | 24.3 | 1%   | 1392.9 | WT     | negative |
| 67 | 1 | 49   | 6.1  | 5.6  | 8%   | 915.8  | WT     | negative |
| 68 | 1 | 313  | 2.8  | 0    | 100% | 0.0    | WT     | negative |
| 69 | 1 | 256  | 7.3  | 0    | 100% | 202.0  | WT     | negative |

|    |   |      |      |       |      |       |        |          |
|----|---|------|------|-------|------|-------|--------|----------|
| 70 | 1 | 328  | 17.5 | 0     | 100% | 288.0 | WT     | negative |
| 73 | 1 | 496  | 11.8 | 0     | 100% | 0.0   | WT     | negative |
| 74 | 1 | 619  | 7.39 | 7.39  | 0%   | 370.6 | WT     | negative |
| 75 | 0 | 734  | 25.4 | 22.9  | 10%  | 0.0   | WT     | negative |
| 76 | 0 | 717  | 40.1 | 13.9  | 65%  | 413.4 | mutant | negative |
| 77 | 1 | 430  | 40.2 | 3.6   | 91%  | 487.2 | WT     | negative |
| 78 | 0 | 630  | 77   | 0     | 100% | 373.4 | mutant | negative |
| 80 | 1 | 289  | 14.6 | 14.4  | 1%   | 950.2 | WT     | negative |
| 81 | 0 | 255  | 587  | 575.8 | 2%   | 0.0   | WT     | negative |
| 82 | 0 | 597  | 81.2 | 0     | 100% | 443.9 | mutant | negative |
| 84 | 0 | 1178 | 61.9 | 0     | 100% | 0.0   | mutant | negative |

**Supplementary Information Table 2.** Source data for multivariate model for overall survival (see Extended Data Fig. 5) from the time of CSF collection. LP=Lumbar Puncture CSF=Cerebral Spinal Fluid.

| Patient #         | CSF ctDNA | Plasma ctDNA    | Plasma coverage |
|-------------------|-----------|-----------------|-----------------|
| <b>Patient-02</b> | Positive  | Negative        | 1070x           |
| <b>Patient-21</b> | Positive  | Negative        | 1253x           |
| <b>Patient-28</b> | Positive  | Negative        | 1010x           |
| <b>Patient-33</b> | Positive  | Negative        | 957x            |
| <b>Patient-37</b> | Positive  | Negative        | 1228x           |
| <b>Patient-38</b> | Positive  | Negative        | 930x            |
| <b>Patient-34</b> | Positive  | <b>Positive</b> | 1047x           |
| <b>Patient-01</b> | Positive  | Negative        | 908x            |
| <b>Patient-03</b> | Positive  | Negative        | 294x            |
| <b>Patient-05</b> | Positive  | Negative        | 1094x           |
| <b>Patient-06</b> | Positive  | Negative        | 1227x           |
| <b>Patient-10</b> | Positive  | Negative        | 1005x           |
| <b>Patient-11</b> | Positive  | <b>Positive</b> | 857x            |
| <b>Patient-20</b> | Positive  | Negative        | 1557x           |
| <b>Patient-22</b> | Positive  | Negative        | 743x            |
| <b>Patient-23</b> | Positive  | <b>Positive</b> | 1388x           |
| <b>Patient-25</b> | Positive  | Negative        | 650x            |
| <b>Patient-26</b> | Positive  | Negative        | 1017x           |
| <b>Patient-40</b> | Positive  | Negative        | 1253x           |

**Supplementary Information Table 3. Comparison of CSF and plasma cfDNA for 19 patients.** 211/896 of the mutations previously detected in CSF ctDNA from these 19 patients were contained within the targets of a custom high-sensitivity capture-based plasma NGS assay. cfDNA samples were sequenced to an average raw sequence coverage of >18,000x (range 9676x-32194x raw sequencing coverage not shown) and collapsed using unique molecular indexes (UMIs) to create consensus sequences representing individual DNA molecules. The average unique sequence coverage after collapsing is shown. Mutations from the CSF were considered to be present in the plasma if they were detected in two or more independent cfDNA molecules, or approximately 0.2% mutant allele fraction.



| Sample #   | Chr | Pos       | Ref | Alt | Gene   | cDNAChange | AAChange | Total Depth(DP) | Variant Allele Depth(AD) | PLASMA Variant Allele Frequency(VAF) | CSF Variant Allele Frequency(VAF) |
|------------|-----|-----------|-----|-----|--------|------------|----------|-----------------|--------------------------|--------------------------------------|-----------------------------------|
| Patient-11 | 17  | 7578271   | T   | C   | TP53   | c.578A>G   | p.H193R  | 896             | 4                        | 0.004                                | 0.983                             |
| Patient-23 | 17  | 7578406   | C   | T   | TP53   | c.524G>A   | p.R175H  | 828             | 5                        | 0.005                                | 0.493                             |
| Patient-23 | 17  | 7574003   | G   | A   | TP53   | c.1024C>T  | p.R342*  | 844             | 3                        | 0.006                                | 0.444                             |
| Patient-34 | 5   | 112155017 | G   | A   | APC    | c.1288G>A  | p.G430S  | 1226            | 4                        | 0.003                                | 0.137                             |
| Patient-34 | 1   | 27101201  | G   | A   | ARID1A | c.4483G>A  | p.G1495S | 913             | 5                        | 0.005                                | 0.134                             |
| Patient-34 | 1   | 27097808  | C   | T   | ARID1A | c.3397C>T  | p.P1133S | 833             | 5                        | 0.006                                | 0.165                             |
| Patient-34 | X   | 66766520  | G   | A   | AR     | c.1262G>A  | p.G421E  | 830             | 4                        | 0.004                                | 0.126                             |
| Patient-34 | X   | 66765436  | C   | T   | AR     | c.448C>T   | p.P150S  | 1400            | 4                        | 0.006                                | 0.159                             |
| Patient-34 | 11  | 108137982 | G   | A   | ATM    | c.2551G>A  | p.D851N  | 1259            | 6                        | 0.005                                | 0.058                             |
| Patient-34 | 13  | 32914196  | G   | A   | BRCA2  | c.5704G>A  | p.D1902N | 1192            | 3                        | 0.007                                | 0.100                             |
| Patient-34 | 16  | 3786740   | G   | A   | CREBBP | c.4471C>T  | p.Q1491* | 1146            | 3                        | 0.003                                | 0.041                             |
| Patient-34 | 14  | 38061670  | C   | T   | FOXA1  | c.319G>A   | p.A107I  | 1266            | 2                        | 0.002                                | 0.143                             |
| Patient-34 | 14  | 38061768  | C   | T   | FOXA1  | c.221G>A   | p.G74E   | 1216            | 16                       | 0.011                                | 0.405                             |
| Patient-34 | 14  | 38061812  | C   | T   | FOXA1  | c.177G>A   | p.M59I   | 1220            | 2                        | 0.002                                | 0.048                             |
| Patient-34 | 3   | 138665527 | C   | T   | FOXL2  | c.38G>A    | p.G13E   | 1078            | 3                        | 0.003                                | 0.091                             |
| Patient-34 | 2   | 209113112 | C   | T   | IDH1   | c.395G>A   | p.R132H  | 591             | 3                        | 0.011                                | 0.448                             |
| Patient-34 | 12  | 25378670  | G   | A   | KRAS   | c.328C>T   | p.P110S  | 1011            | 2                        | 0.003                                | 0.117                             |
| Patient-34 | 15  | 66774162  | G   | A   | MAP2K1 | c.638G>A   | p.G213E  | 1208            | 5                        | 0.005                                | 0.101                             |
| Patient-34 | 3   | 37038114  | G   | A   | MLH1   | c.121G>A   | p.D41N   | 658             | 5                        | 0.008                                | 0.431                             |
| Patient-34 | 2   | 48026579  | C   | T   | MSH6   | c.1457C>T  | p.T486I  | 1153            | 4                        | 0.003                                | 0.096                             |
| Patient-34 | 8   | 128751158 | C   | T   | MYC    | c.695C>T   | p.S232F  | 1054            | 14                       | 0.020                                | 0.263                             |
| Patient-34 | 17  | 29654667  | G   | A   | NF1    | c.5419G>A  | p.G1807S | 1142            | 3                        | 0.003                                | 0.051                             |
| Patient-34 | 1   | 115256578 | C   | T   | NRAS   | c.133G>A   | p.V45I   | 919             | 2                        | 0.002                                | 0.045                             |
| Patient-34 | 1   | 156845911 | G   | A   | NTRK1  | c.1541G>A  | p.W514*  | 1597            | 9                        | 0.007                                | 0.151                             |
| Patient-34 | 20  | 9561565   | C   | T   | PAK7   | c.217G>A   | p.G73R   | 1120            | 4                        | 0.003                                | 0.145                             |
| Patient-34 | 13  | 48941735  | G   | A   | RB1    | c.1045G>A  | p.D349N  | 896             | 11                       | 0.014                                | 0.463                             |
| Patient-34 | 18  | 48575056  | G   | A   | SMAD4  | c.250G>A   | p.V84M   | 897             | 2                        | 0.002                                | 0.126                             |
| Patient-34 | 5   | 1295243   | G   | A   | TERT   |            |          | 599             | 3                        | 0.010                                | 0.300                             |
| Patient-34 | 17  | 7578475   | G   | T   | TP53   | c.455C>A   | p.P152Q  | 1066            | 10                       | 0.008                                | 0.453                             |
| Patient-34 | 17  | 7577538   | C   | T   | TP53   | c.743G>A   | p.R248Q  | 871             | 7                        | 0.012                                | 0.478                             |
| Patient-34 | 9   | 135772593 | C   | T   | TSC1   | c.2953G>A  | p.A985T  | 1002            | 2                        | 0.002                                | 0.041                             |
| Patient-34 | 16  | 2098680   | G   | A   | TSC2   | c.64G>A    | p.G22R   | 952             | 2                        | 0.002                                | 0.114                             |
| Patient-34 | 16  | 2122981   | A   | C   | TSC2   | c.2352A>C  | p.K784N  | 1222            | 18                       | 0.011                                | 0.476                             |
| Patient-34 | 3   | 10183848  | G   | A   | VHL    | c.317G>A   | p.G106D  | 675             | 20                       | 0.022                                | 0.433                             |
| Patient-34 | 3   | 10191515  | G   | A   | VHL    | c.508G>A   | p.V170I  | 1179            | 2                        | 0.002                                | 0.058                             |

**Supplementary Information Table 4. Sequence variants detected in plasma cfDNA using a high-sensitivity capture-based NGS assay.** Allele counts represent individual distinct cfDNA molecules after UMI-based collapsing.

**Supplementary Information Table 5. Matched pair analysis complete mutation list (see excel file for table).** SNVs detected in tumor and CSF from 36 glioma patients with positive CSF ctDNA and available tumor tissue for comparison.
